# Supplementary material
Source: PubMed Central journal article supplement (PMC3095940)
Supplement: supp_44_3_415__1.pdf [file supp_44_3_415__1.pdf]

## **Simvastatin Attenuates Radiation-Induced Murine Lung Injury and Dysregulated Lung Gene Expression**

Biji Mathew<sup>1</sup>, Yong Huang<sup>2</sup>, Jeffrey R. Jacobson<sup>1</sup>, Evgeny Berdyshev<sup>1</sup>, Lynnette M. Gerhold<sup>3</sup>, Ting Wang<sup>1</sup>, Liliana Moreno-Vinasco<sup>1</sup>, Gabriel Lang<sup>1</sup>, Yutong Zhao<sup>1</sup>, Chin Tu Chen<sup>3</sup>, Patrick J. LaRiviere<sup>3</sup>, Helena Mauceri<sup>4</sup>, Saad Sammani<sup>1</sup>, Aliya N. Husain<sup>5</sup>, Steven M. Dudek<sup>1</sup>, Viswanathan Natarajan<sup>1</sup>, Yves A. Lussier<sup>2</sup>, Ralph R. Weichselbaum<sup>4\*</sup>, Joe G.N. Garcia<sup>1\*</sup>.

\*Co-senior authors of this work.

Online Data Supplement

**Supplemental Table 1: Gene filtering criteria and results by significant analysis of microarray**

| Gene List* | 2-group comparison           | Delta | FDR% | Fold | Probe sets | Up   | Down |
|------------|------------------------------|-------|------|------|------------|------|------|
| 1          | Radiation vs Control         | 15    | 3.8  | 2.0  | 3224       | 677  | 2547 |
| 2          | Radiation-Simva vs Radiation | 15    | 4.5  | 2.0  | 3037       | 2560 | 477  |
| 3          | Radiation- Simva vs Simva    | 15    | 3.0  | 2.0  | 933        | 461  | 472  |

\* Gene list 1, 2 and 3 are the microarray result of 6 wks observation (GEO accession number GSE14431). The full lists of genes can be found in website <http://phenos.bsd.uchicago.edu/publication/Radiation-Simvastatin>.

**Supplemental Table 2: Biological process enriched with genes repressed by irradiation and reversed by simvastatin**

| GO ID - Function Name                                    | Gene List 1 |                 | Gene List 2 |                 |
|----------------------------------------------------------|-------------|-----------------|-------------|-----------------|
|                                                          | #           | <i>q</i> -value | #           | <i>q</i> -value |
| GO:0006511 ubiquitin-dependent protein catabolic process | 22          | 1.6E-03         | 17          | 4.5E-02         |
| GO:0006350 Transcription                                 | 156         | 5.5E-04         | 125         | 8.2E-03         |
| GO:0006397 mRNA processing                               | 41          | 3.1E-07         | 31          | 8.2E-03         |
| GO:0007186 GPCR protein signaling pathway                | 12          | 1.9E-03         | 8           | 8.4E-03         |
| GO:0006355 regulation of transcription, DNA-dependent    | 144         | 8.4E-03         | 136         | 4.5E-02         |
| GO:0016568 chromatin modification                        | 25          | 1.9E-03         | 19          | 4.8E-02         |
| GO:0008380 RNA splicing                                  | 31          | 3.1E-05         | 24          | 1.7E-02         |
| GO:0008152 metabolic process                             | -----       | NS              | 15          | 1.3E-02         |
| GO:0007242 intracellular signaling cascade               | -----       | NS              | 36          | 1.7E-02         |
| GO:0006468 protein amino acid phosphorylation            | -----       | NS              | 31          | 1.4E-02         |

Differentially expressed genes in Gene list 1 and 2 were identified by Significant Analysis of Microarray described in Supplemental Table 1. The genes downregulated by irradiation in Gene list 1 or the genes upregulated by simvastatin in Gene list 2 were uploaded into Onto-Express software to identify overrepresented Gene Ontology (GO) categories. The significance is set at *q*-value < 0.05 with more than 6 genes in the biological process (see Methods). \*: *p*-value adjusted by Benjamini-Hochberg approach to control multiple test.

**Supplemental Table 3: PubMed database blast (PubMatrix) of potential gene/protein RILI interactome components.**

| Pubmatrix | Radiation | irradiation | X-ray | pulmonary fibrosis | Radiation pneumonitis |
|-----------|-----------|-------------|-------|--------------------|-----------------------|
| CDC2a     | 0         | 1           | 0     | 0                  | 0                     |
| ccna2     | 2         | 3           | 1     | 0                  | 0                     |
| syk       | 22        | 23          | 19    | 1                  | 0                     |
| fcer1g    | 1         | 1           | 0     | 0                  | 0                     |
| vav3      | 0         | 0           | 0     | 0                  | 0                     |
| CD44      | 145       | 194         | 28    | 22                 | 2                     |
| mmp9      | 12        | 13          | 11    | 6                  | 0                     |
| itgam     | 99        | 110         | 17    | 11                 | 0                     |

PubMatrix analysis of selected prioritized interactome genes/proteins depicted in Figure 4B. These interacting proteins were blasted against PubMatrix headers reflecting radiation responses. The majority of these genes reflect involvement in normal cellular responses to radiation.
